# Supplementary material
Source: PubMed Central journal article supplement (PMC4788286)
Supplement: mase889519.ww1_default.pdf [file mase889519.ww1_default.pdf]

## Appendix

### Characteristics of the studies included in the review

| Authors, year and country                                                                                       | Intervention                                                                                               | Design                                                                                                    | Outcome indicators                                                                     |
|-----------------------------------------------------------------------------------------------------------------|------------------------------------------------------------------------------------------------------------|-----------------------------------------------------------------------------------------------------------|----------------------------------------------------------------------------------------|
| <i>Biofortification</i><br>Gunaratna et al. <sup>11</sup> , (2010) Ghana, Ethiopia, India, Mexico and Nicaragua | Seeds for the production of protein-fortified maize                                                        | Meta-analysis of 9 unpublished RCTs                                                                       | Rate of growth of children weight                                                      |
| Low et al. <sup>21</sup> , (2007) Mozambique                                                                    | Promotion of orange-fleshed sweet potato by agricultural, nutrition education and marketing                | Longitudinal comparison of participants and non-participants from project and control villages            | Consumption of sweet potato. Vitamin A intake. Undernutrition rates.                   |
| <i>Home gardens</i><br>Attig et al. <sup>22</sup> , (1993) Thailand                                             | Promotion of vitamin A rich food through social marketing, nutrition education and home and school gardens | Longitudinal comparison of households from project and control villages                                   | Vitamin A intake                                                                       |
| Bushamuka et al. <sup>12</sup> , (2005) Bangladesh                                                              | Promotion of vitamin A rich vegetables through home gardens and nutritional surveillance                   | Cross-sectional comparison of matched participants and non-participants from project and control villages | Consumption of vitamin A rich food                                                     |
| De Pee <sup>23</sup> , (1998) Indonesia                                                                         | Promotion of vitamin A rich food through a social marketing campaign                                       | Cross-sectional comparison of participants and non-participants                                           | Consumption of vitamin A rich food. Serum retinol concentration.                       |
| Faber et al. <sup>24</sup> , (2002) South Africa                                                                | Promotion of yellow and dark-green vegetables through home gardens and growth monitoring and promotion     | Longitudinal comparison of households from project and control villages                                   | Consumption of vitamin A rich food. Serum retinol concentration. Undernutrition rates. |
| Greiner et al. <sup>25</sup> , (1995) Bangladesh                                                                | Promotion of vitamin A rich vegetables through home gardens and nutrition education                        | Longitudinal comparison of households from matched project and control villages                           | Consumption of vitamin A rich food                                                     |
| Jones et al. <sup>26</sup> , (2005) Nepal                                                                       | Promotion of home gardens and high-value crops with nutrition education                                    | Cross-sectional comparison of households from project and control villages                                | Consumption of vitamin A rich food                                                     |
| Kidala et al. <sup>9</sup> , (2000) Tanzania                                                                    | Promotion of vitamin A rich food through home gardens and nutrition education                              | Cluster level RCT                                                                                         | Consumption of vitamin A rich food. Serum retinol concentration.                       |
| Laurie et al. <sup>27</sup> , (2008) South Africa                                                               | Home gardens, nutrition education and growth monitoring and promotion                                      | Cross-sectional comparison of households from matched project and control villages                        | Consumption of vitamin A rich food                                                     |
| Makhotla et al. <sup>28</sup> , (2004) Lesotho                                                                  | Home gardens promotion                                                                                     | Cross-sectional comparison of participants and non-participants                                           | Undernutrition rates                                                                   |
| Marsh <sup>16</sup> , (1997) Bangladesh                                                                         | Home gardens and nutrition education                                                                       | Longitudinal comparison of                                                                                | Household income. Consumption of vitamin                                               |

|                                                                                                    |                                                                                                 |                                                                                   |                                                                                              |
|----------------------------------------------------------------------------------------------------|-------------------------------------------------------------------------------------------------|-----------------------------------------------------------------------------------|----------------------------------------------------------------------------------------------|
| Olney et al. <sup>13</sup> , (2009)<br>Cambodia                                                    |                                                                                                 | household from project and control villages                                       | A rich food. Undernutrition rates.                                                           |
|                                                                                                    | Promotion of vitamin A rich food through seeds and technical assistance                         | Longitudinal comparison of matched participants and non-participants              | Income. Consumption of vitamin A rich food. Haemoglobin concentration. Undernutrition rates. |
| Schipani et al. <sup>19</sup> , (2002) Thailand                                                    |                                                                                                 | Longitudinal comparison of matched participants and non-participants              | Income. Vitamin A intake. Haemoglobin and serum retinol concentration. Undernutrition rates  |
|                                                                                                    | Promotion of mixed gardens (vegetables, fish and small animals)                                 |                                                                                   |                                                                                              |
| Shmidt et al. <sup>29</sup> , (1995) South Africa                                                  |                                                                                                 | Cross-sectional comparison of matched participants and non-participants           | Consumption of micronutrients rich food. Serum retinol concentration. Undernutrition rates.  |
|                                                                                                    | Communal home garden                                                                            |                                                                                   |                                                                                              |
| Smitasiri et al. <sup>30</sup> , (1999) Thailand                                                   |                                                                                                 | Longitudinal comparison of project and control villages                           | Consumption of vitamin A rich food. Serum retinol concentration.                             |
|                                                                                                    | Promotion of vitamin A rich food through social marketing, nutrition education and home gardens |                                                                                   |                                                                                              |
| Talukder et al. <sup>14</sup> , (2010) Bangladesh, Cambodia, Nepal and Philippines                 |                                                                                                 | Longitudinal comparison of matched participants from project and control villages | Income. Consumption of micronutrient rich food. Anaemia and night-blindness.                 |
|                                                                                                    | Home gardens and nutrition education                                                            |                                                                                   |                                                                                              |
| Vijayraghavan et al. <sup>31</sup> , (1997) India (AP)                                             |                                                                                                 | Longitudinal comparison of project and control villages                           | Consumption of vitamin A rich food. Bitot's spot prevalence.                                 |
|                                                                                                    | Promotion of vitamin A rich food through seeds and technical assistance                         |                                                                                   |                                                                                              |
| <i>Small scale fisheries and aquaculture</i><br>Aiga et al. <sup>32</sup> , (2009) Malawi          |                                                                                                 | Cross-sectional comparison of matched project and control villages                | Income. Undernutrition rates.                                                                |
|                                                                                                    | Promotion of small scale fish farming                                                           |                                                                                   |                                                                                              |
| Murshed-e-Jahan et al. <sup>17</sup> , (2010) Bangladesh                                           |                                                                                                 | Longitudinal comparison of project and control villages                           | Income. Consumption of fish.                                                                 |
|                                                                                                    | Promotion of aquaculture through training and low-cost technology                               |                                                                                   |                                                                                              |
| Roos et al. <sup>20</sup> , (2003) Bangladesh                                                      |                                                                                                 | Longitudinal comparison of matched participants and non-participants              | Consumption of fish                                                                          |
|                                                                                                    | Promotion of small scale fisheries                                                              |                                                                                   |                                                                                              |
| <i>Dairy development</i><br>Hoorweg et al. <sup>15</sup> , (2000) Kenya                            |                                                                                                 | Cross-sectional comparison of households from project and control villages        | Income. Milk consumption. Undernutrition rates.                                              |
|                                                                                                    | Promotion of intensive dairy farming                                                            |                                                                                   |                                                                                              |
| <i>Animal husbandry and poultry production</i><br>Nielsen et al. <sup>18</sup> , (2003) Bangladesh |                                                                                                 | Cross-sectional comparison of households from project and control villages        | Income. Consumption of egg, chicken and other promoted food.                                 |
|                                                                                                    | Promotion of semi-scavenging poultry production                                                 |                                                                                   |                                                                                              |
